# Supplementary material
Source: PubMed Central journal article supplement (PMC4139099)
Supplement: NIHMS614333-supplement-Supporting_Info.pdf [file NIHMS614333-supplement-Supporting_Info.pdf]

## SUPPORTING INFORMATION

### Asteropsins B-D, Sponge-Derived Knottins with Potential Utility as a Novel Scaffold for Oral Peptide Drugs

Huayue Li<sup>a</sup>, John J. Bowling<sup>b,e</sup>, Mingzhi Su<sup>a</sup>, Jongki Hong<sup>c</sup>, Bong-Jin Lee<sup>d</sup>, Mark T. Hamann<sup>b,\*\*</sup>, Jee H. Jung<sup>a,\*</sup>

<sup>a</sup> College of Pharmacy, Pusan National University, Busan 609-735, Korea

<sup>b</sup> Department of Pharmacognosy, School of Pharmacy, The University of Mississippi, Oxford, Mississippi 38677, USA

<sup>c</sup> College of Pharmacy, Kyung Hee University, Seoul 130-701, Korea

<sup>d</sup> College of Pharmacy, Seoul National University, Seoul 151-742, Korea

<sup>e</sup> Present address: Department of Chemical Biology and Therapeutics, St. Jude Children's Research Hospital, Memphis, Tennessee 38105, USA

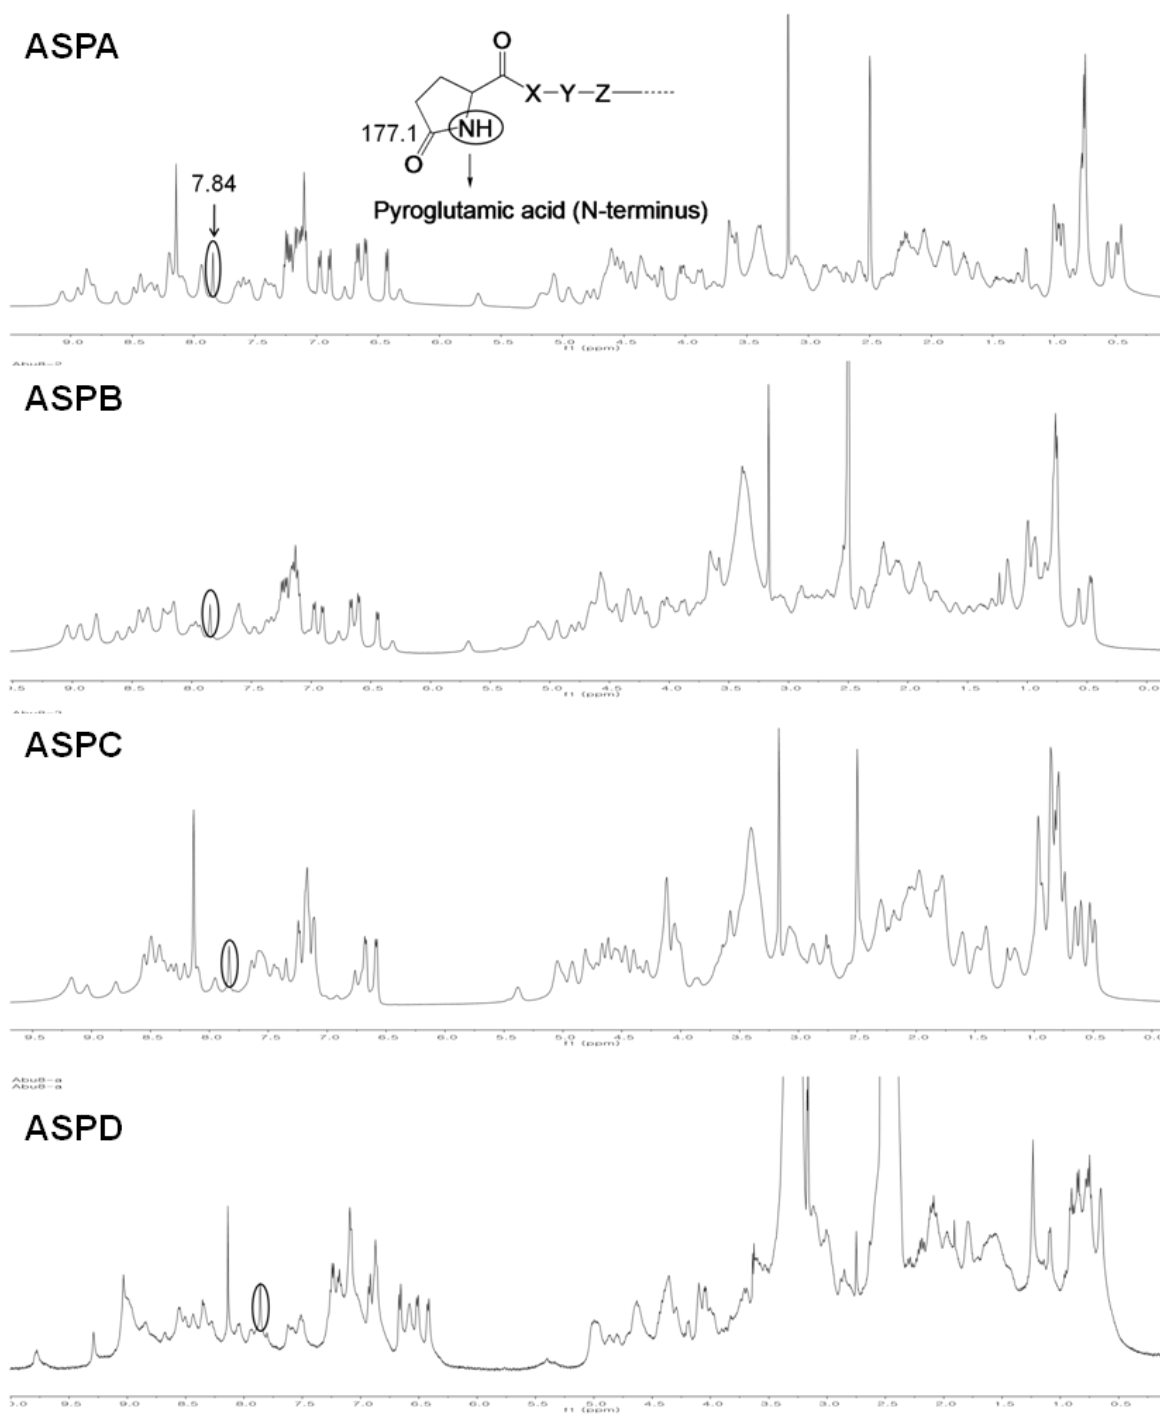

**Fig. S1.**  $^1\text{H}$  NMR spectra of Asteropsins A-D (ASPA, ASPB, ASPC, and ASPD) in  $\text{DMSO-}d_6$  (500 MHz). The circled sharp peaks correspond to the amide proton of *N*-terminal pyroglutamyl ring.

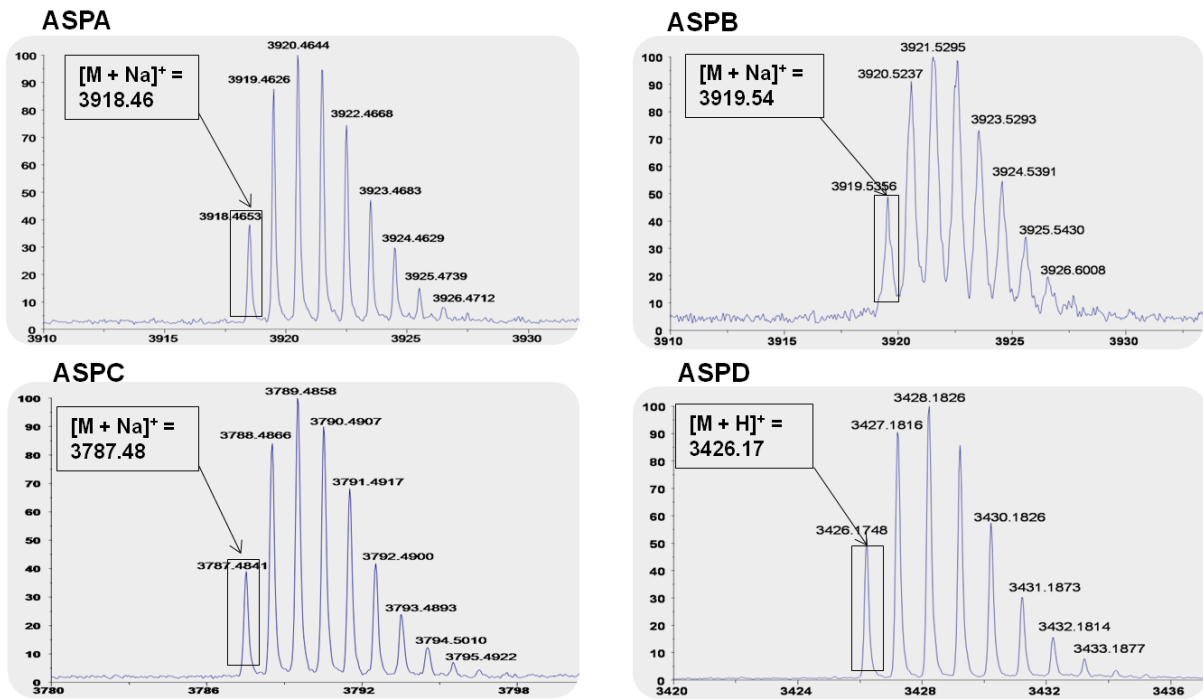

**Fig. S2.** MALDI-TOF MS spectra of Asteropsins A-D.

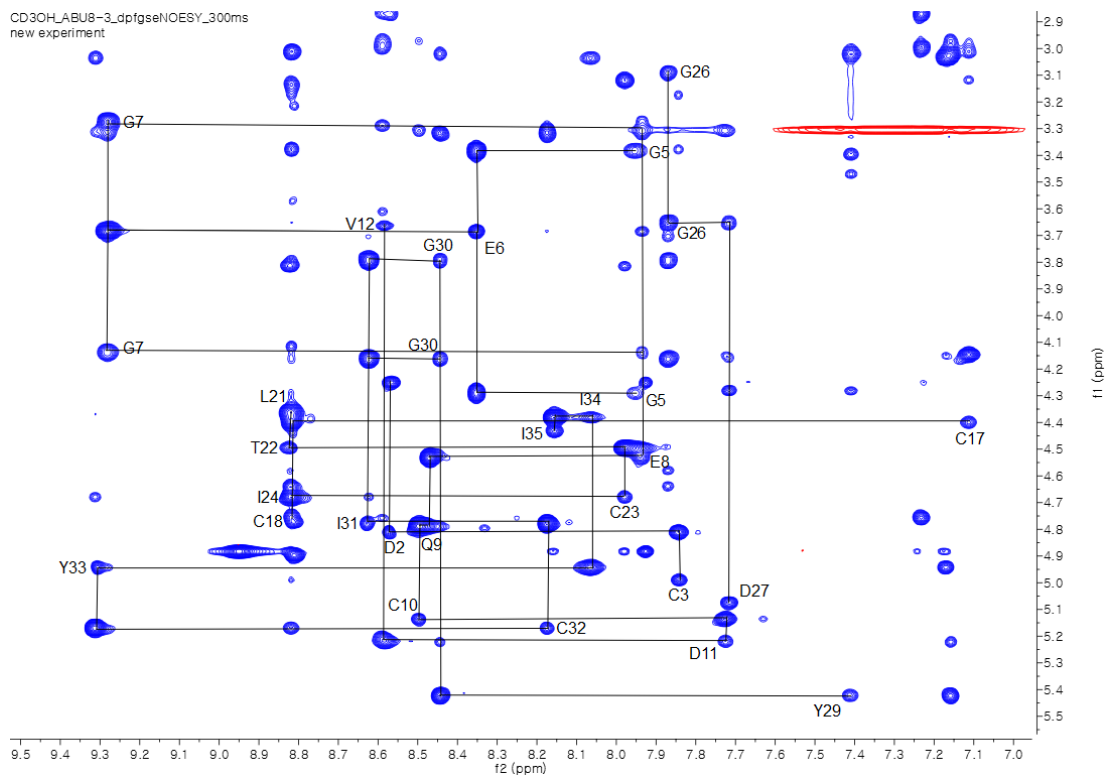

**Fig. S3.** Sequential  $C^{\alpha}H(i)$ - $NH(i + 1)$  connectivities of ASPC in the  $C^{\alpha}H$ - $NH$  fingerprint region of the NOESY spectrum recorded in  $CD_3OH$  (900 MHz). The mixing time of the NOESY spectrum is 300 ms. Intra-residue  $C^{\alpha}H$ - $NH$  cross peaks are marked with the one-letter code for the amino acid and residue number.

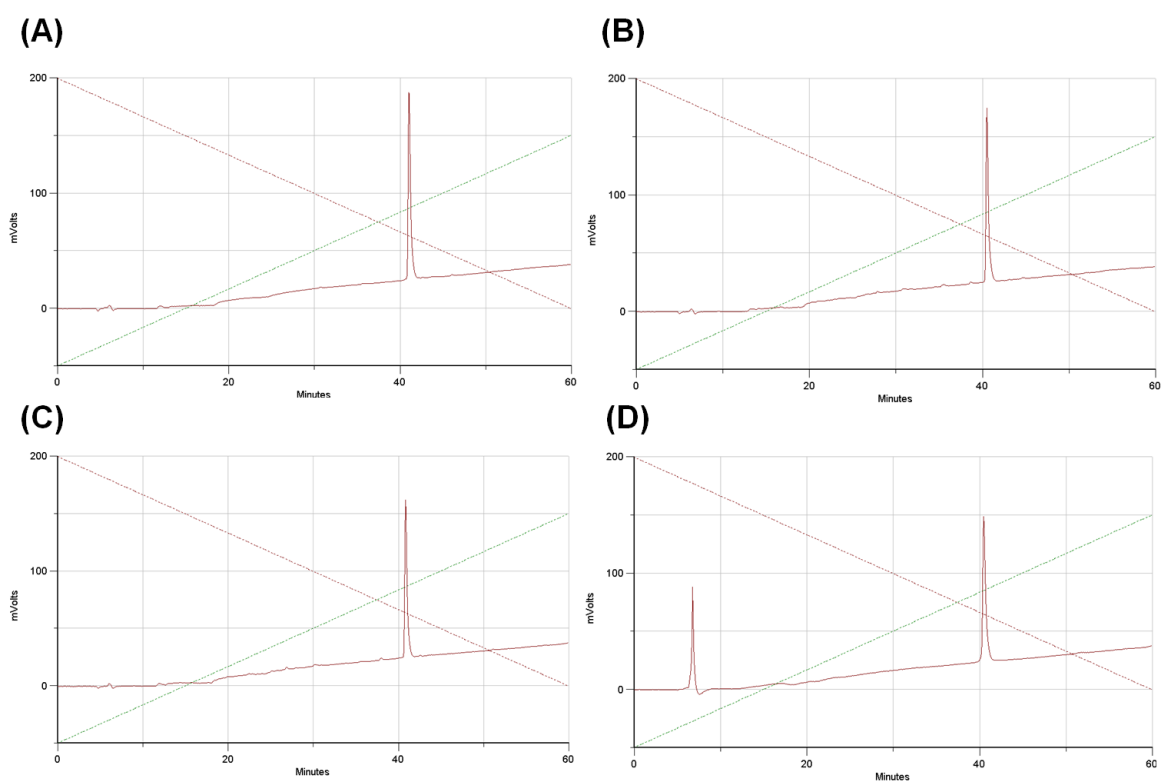

**Fig. S4.** HPLC chromatograms of remaining ASPA after enzymatic degradation by thermolysin and proteinase K. (A) Standard ASPA (B) ASPA + thermolysin, 4 h (C) ASPA + thermolysin, 12 h, (D) ASPA + proteinase K, 48 h. According to the peak area of HPLC chromatograms, the remaining amount of ASPA was (B) 91%, (C) 80%, and (D) 94% compared to (A) the beginning point.

**Table S1**

Analysis of the possible disulfide bonding patterns in ASPB and ASPC.

| Disulfide pattern | Mean distance (Å) <sup>a</sup> |                  |
|-------------------|--------------------------------|------------------|
|                   | ASPB                           | ASPC             |
| I-II              | 9.9 ± 0.4                      | 9.6 ± 0.8        |
| I-III             | 9.0 ± 1.4                      | 8.8 ± 0.4        |
| <b>I-IV</b>       | <b>4.3 ± 0.9</b>               | <b>4.4 ± 1.2</b> |
| I-V               | 11.7 ± 2.2                     | 12.5 ± 0.4       |
| I-VI              | 9.3 ± 0.7                      | 8.9 ± 0.4        |
| II-III            | 6.1 ± 0.9                      | 4.5 ± 1.3        |
| II-IV             | 10.9 ± 0.8                     | 9.3 ± 1.2        |
| <b>II-V</b>       | <b>4.2 ± 0.6</b>               | <b>4.2 ± 1.1</b> |
| II-VI             | 4.2 ± 1.0                      | 4.4 ± 0.2        |
| III-IV            | 8.2 ± 0.6                      | 7.7 ± 1.0        |
| III-V             | 5.5 ± 2.3                      | 6.0 ± 2.1        |
| <b>III-VI</b>     | <b>4.4 ± 1.2</b>               | <b>4.5 ± 1.1</b> |
| IV-V              | 11.4 ± 1.1                     | 11.7 ± 0.8       |
| IV-VI             | 9.1 ± 0.2                      | 7.4 ± 1.0        |
| V-VI              | 5.7 ± 1.5                      | 6.3 ± 0.1        |

<sup>a</sup> Mean S-S distances (Å) calculated from the 20 lowest energy structures without disulfide bond restraints

**Table S2**Cytotoxicity of asteropsins A-D<sup>a</sup> against human solid tumor cell lines.

| Peptide     | A549   | SK-OV-3 | SK-MEL-2 | XF498  | HCT15  |
|-------------|--------|---------|----------|--------|--------|
| ASPA        | > 30   | > 30    | > 30     | > 30   | > 30   |
| ASPB        | > 30   | > 30    | > 30     | > 30   | > 30   |
| ASPC        | > 30   | > 30    | > 30     | > 30   | > 30   |
| ASPD        | > 30   | > 30    | > 30     | > 30   | > 30   |
| Doxorubicin | 0.0012 | 0.0352  | 0.0011   | 0.0304 | 0.0475 |

<sup>a</sup> Data expressed in ED<sub>50</sub> values (µg/mL). A-549, human lung cancer; SK-OV-3, human ovarian cancer; SK-MEL-2, human skin cancer; XF-498, human CNS cancer; HCT-15, human colon cancer.

## SUPPLEMENTARY EXPERIMENTAL METHODS

**Trypsin and chymotrypsin inhibitory assay.** The enzymatic activity of bovine trypsin and chymotrypsin (Sigma-Aldrich) was measured spectrophotometrically. Trypsin was dissolved in 50 mM Tris/HCl, pH 8.0, to a final concentration of 20 mg/mL. Chymotrypsin, was dissolved in 10 mM Tris/HCl, pH 8.0, to a final concentration of 1  $\mu$ g/mL. Enzymes were incubated for 10 min at 37°C in the presence of various concentrations of peptides (0.01 – 100  $\mu$ g/mL). After incubation, the remaining enzymatic activity was determined using the corresponding chromogenic substrates: BApNA (*N* $_{\alpha}$ -benzoyl-DL-arginine *p*-nitroanilide) for trypsin and *N*-succinyl-Ala-Ala-Pro-Phe *p*-nitroanilide for chymotrypsin. Final concentration of the substrates was 0.5 mg/mL. Kinetics of *p*-nitroaniline release was measured at 405 nm.

**Enzymatic degradation by thermolysin and proteinase K.** Peptides, thermolysin (from *Bacillus thermoprotelyticus* Rokko), and proteinase K (from *Tritirachium album*) were prepared in 50 mM Tris-HCl buffer (pH 8.0). The peptide solution (0.5 mg/mL, 225  $\mu$ L) were added to 25  $\mu$ L of thermolysin (4 mg/mL) and proteinase K (2 mg/mL), respectively. Digestions using thermolysin was incubated at 65°C and proteinase K at 50°C. Aliquots (20  $\mu$ L) were taken at appropriate time intervals and was analyzed by reversed-phase HPLC using a UV detector (YMC ODS column 250 mm  $\times$  4.6 mm, i.d. 5  $\mu$ m; wavelength: 220 nm) at a flow rate of 0.5 mL/min with a linear gradient elution (0-80% solvent B; solvent A: H<sub>2</sub>O + 0.1% TFA, solvent B: 90% ACN + 0.1% TFA).

**Cytotoxicity against human cancer cell lines.** Rapidly growing cells (A-549, human lung cancer; SK-OV-3, human ovarian cancer; SK-MEL-2, human skin cancer; XF-498, human CNS cancer; HCT-15, human colon cancer) were harvested, counted, and inoculated at the appropriate concentrations ((1-2)  $\times$  10<sup>4</sup> cells/ well) into 96-well microtiter plates. After incubation for 24 h, the compounds dissolved in culture medium (RPMI 1640, Gibco; 10% FBS, Gibco) were applied to the culture wells in triplicate followed by incubation for 48 h at 37°C under a 5% CO<sub>2</sub> atmosphere. The culture was fixed with cold TCA, and was stained by 0.4% SRB (sulforhodamine B, Sigma) dissolved in 1% acetic acid. After solubilizing the bound dye with 10 mM unbuffered Tris base using a gyrotatory shaker, the absorbance at 520 nm was measured with a microplate reader (Dynatech Model MR 700). The fifty percent inhibitory concentration (ED<sub>50</sub>) was defined as the concentration that reduced absorbance by 50% compared to the control level in untreated wells.
